# Supplementary material for: Escherichia coli O80 in Healthy Cattle: Absence of Shigatoxigenic and Enteropathogenic E. coli O80:H2 and (Phylo) Genomics of Non-Clonal Complex 165 E. coli O80
Source: MDPI journal article supplement (doi:10.3390/microorganisms11020230), 2023-01-17
Supplement: s1 [file s1]

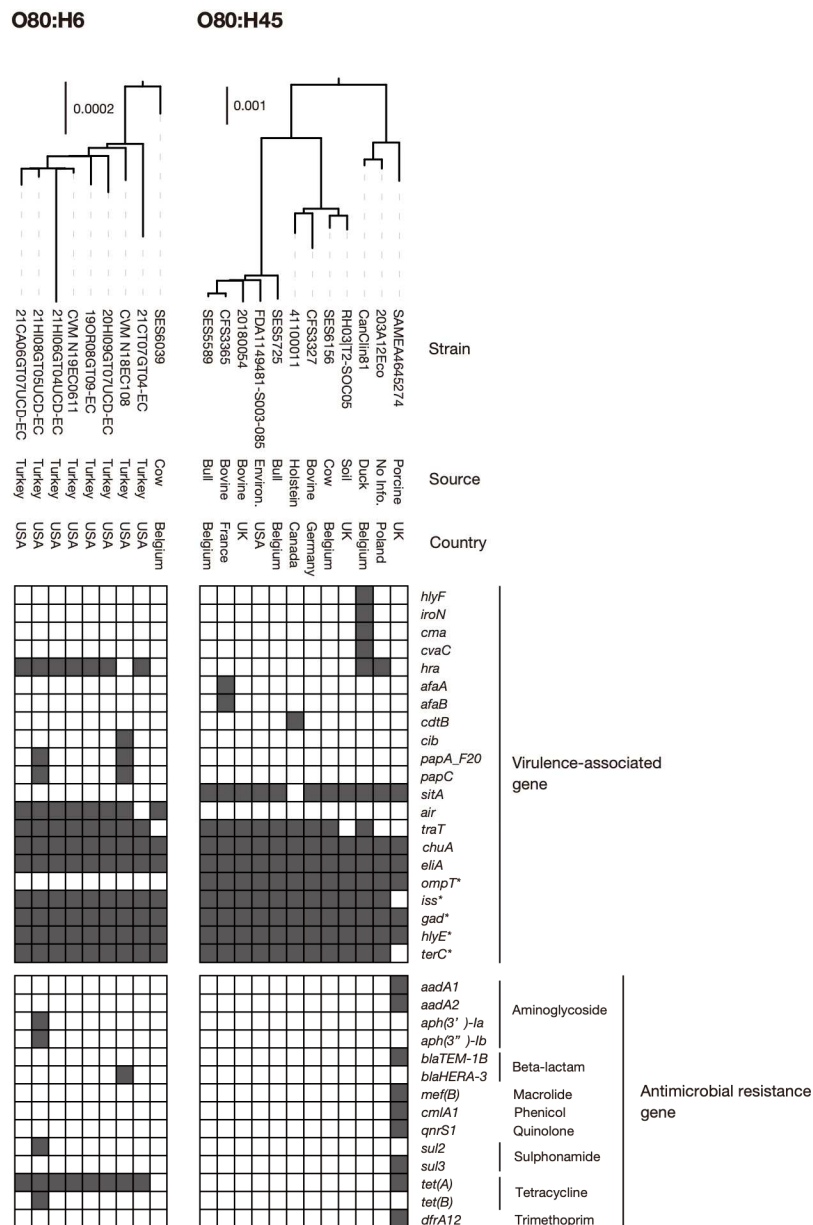

**Figure S1.** Virulence-associated and AMR genes found in O80:H6 and O80:H45 strains.

The results of gene search by using VirulenceFinder and ResFinder are mapped to the ML trees of O80:H6 and O80:H45 (the same trees as shown in Figure 2 in the main text). The presence/absence of each gene is indicated by a filled/open box. Genes found in *E. coli* strain K-12 (No. NC\_000913) are indicated by asterisks. Bar, the mean number of nucleotide substitutions per site.
