# Supplementary material for: Escherichia coli O80 in Healthy Cattle: Absence of Shigatoxigenic and Enteropathogenic E. coli O80:H2 and (Phylo) Genomics of Non-Clonal Complex 165 E. coli O80
Source: Microorganisms. 2023 Jan 17;11(2):230. doi: 10.3390/microorganisms11020230 (PMC9962692; doi:10.3390/microorganisms11020230)
Supplement: Supplementary file 1 [file microorganisms-11-00230-s001.zip › Tables S1_S2_S3.xlsx]

## Sheet: TableS1
Table S1. O80:H45 and O80:H6 strains used in WGS analyses.
																				Plasmid replicon*																		pS88-encoded gene
Identical clone at core gene level	Strain	Phylo- group	Serotype	ST	Country	Year	Source		Total length (bp)	max scaffold length	No. of scaffolds	N50	L50		Accession number	Bioproject	BioSample	Reference		IncFIA	IncFIB (AP001918)	IncFIC (FII)	IncFIA (HI1)	IncFIB (K)	IncFII (29)	IncFI1-I (Alpha)	IncFII (pSE11)	IncFII (pB171)	IncFII (pRSB107)	IncY	Col (MG828)	Col156	Col440I	ColRNAI	ColpVC	p0111		hlyF	ompT	cvi	iroB	iroC	iroD	iroE	iroN	sitB	sitC	sitD	sitA
1	SES6039	E	O80:H6	8619	Belgium	2022	Healthy Cow		5033074	807165	67	416454	5		SRR22703834	PRJNA906740	SAMN32092024	This study		-	-	-	-	-	-	-	-	-	-	+	-	-	-	-	-	-		-	-	-	-	-	-	-	-	-	-	-	-
1	SES6040	E	O80:H6	8619	Belgium	2022	Healthy Cow		5034801	807012	74	416454	5		SRR22703833	PRJNA906740	SAMN32092025	This study		-	-	-	-	-	-	-	-	-	-	+	-	-	-	-	-	-		-	-	-	-	-	-	-	-	-	-	-	-
1	SES6041	E	O80:H6	8619	Belgium	2022	Healthy Cow		5033861	807165	73	416454	5		SRR22703832	PRJNA906740	SAMN32092026	This study		-	-	-	-	-	-	-	-	-	-	+	-	-	-	-	-	-		-	-	-	-	-	-	-	-	-	-	-	-
1	SES6042	E	O80:H6	8619	Belgium	2022	Healthy Cow		5035638	807165	73	423196	5		SRR22703831	PRJNA906740	SAMN32092027	This study		-	-	-	-	-	-	-	-	-	-	+	-	-	-	-	-	-		-	-	-	-	-	-	-	-	-	-	-	-
1	SES6043	E	O80:H6	8619	Belgium	2022	Healthy Cow		5034029	571850	70	398561	6		SRR22703830	PRJNA906740	SAMN32092028	This study		-	-	-	-	-	-	-	-	-	-	+	-	-	-	-	-	-		-	-	-	-	-	-	-	-	-	-	-	-
1	SES6044	E	O80:H6	8619	Belgium	2022	Healthy Cow		5034249	807112	70	395749	5		SRR22703844	PRJNA906740	SAMN32092029	This study		-	-	-	-	-	-	-	-	-	-	+	-	-	-	-	-	-		-	-	-	-	-	-	-	-	-	-	-	-
1	SES6045	E	O80:H6	8619	Belgium	2022	Healthy Cow		5030953	571850	60	336005	6		SRR22703843	PRJNA906740	SAMN32092030	This study		-	-	-	-	-	-	-	-	-	-	+	-	-	-	-	-	-		-	-	-	-	-	-	-	-	-	-	-	-
1	SES6046	E	O80:H6	8619	Belgium	2022	Healthy Cow		5032522	807261	72	323317	5		SRR22703842	PRJNA906740	SAMN32092031	This study		-	-	-	-	-	-	-	-	-	-	+	-	-	-	-	-	-		-	-	-	-	-	-	-	-	-	-	-	-
1	SES6047	E	O80:H6	8619	Belgium	2022	Healthy Cow		5033823	571850	74	323530	6		SRR22703841	PRJNA906740	SAMN32092032	This study		-	-	-	-	-	-	-	-	-	-	+	-	-	-	-	-	-		-	-	-	-	-	-	-	-	-	-	-	-
1	SES6048	E	O80:H6	8619	Belgium	2022	Healthy Cow		5039763	571850	88	398561	6		SRR22703840	PRJNA906740	SAMN32092033	This study		-	-	-	-	-	-	-	-	-	-	+	-	-	-	-	-	-		-	-	-	-	-	-	-	-	-	-	-	-
	CVM N18EC108	E	O80:H6	8619	United States	2018	ground turkey		5367158	642733	164	344767	6		SRR9002341	PRJNA292663	SAMN11372876	from the NCBI database		-	-	-	-	-	-	+	-	-	+	-	+	-	-	-	-	-		-	-	-	-	-	-	-	-	-	-	-	-
	19OR08GT09-EC	E	O80:H6	8619	United States	2019	ground turkey		5555257	416398	303	174228	10		SRR10231891	PRJNA292663	SAMN12913176	from the NCBI database		-	-	-	-	-	-	-	-	-	+	-	+	+	+	-	-	+		-	-	-	-	-	-	-	-	-	-	-	-
	CVM N19EC0611	E	O80:H6	8619	United States	2019	ground turkey		5506792	433101	260	139893	10		SRR10579933	PRJNA292663	SAMN12990681	from the NCBI database		-	-	-	-	-	-	-	-	-	+	+	+	+	-	-	-	-		-	-	-	-	-	-	-	-	-	-	-	-
	20HI09GT07UCD-EC	E	O80:H6	12217	United States	2020	turkey; ground turkey		5500478	433892	275	141771	10		SRR14129399	PRJNA292663	SAMN18586312	from the NCBI database		-	-	-	-	-	-	-	-	-	+	+	+	+	-	-	-	-		-	-	-	-	-	-	-	-	-	-	-	-
	21CT07GT04-EC	E	O80:H6	8619	United States	2021	turkey		5520094	230613	493	107614	19		SRR15526878	PRJNA292663	SAMN20862110	from the NCBI database		-	-	-	-	-	-	-	-	-	+	-	+	+	-	-	-	+		-	-	-	-	-	-	-	-	-	-	-	-
	21HI06GT04UCD-EC	E	O80:H6	8619	United States	2021	ground turkey		5639566	433366	424	122720	14		SRR16936724	PRJNA292663	SAMN23100074	from the NCBI database		-	-	-	-	-	-	+	-	-	-	+	+	+	-	-	-	-		-	-	-	-	-	-	-	-	-	-	-	-
	21CA06GT07UCD-EC	E	O80:H6	8619	United States	2021	ground turkey		5532506	469133	262	136583	10		SRR18044751	PRJNA292663	SAMN25980720	from the NCBI database		-	-	-	-	-	-	-	-	-	+	-	+	+	-	-	-	+		-	-	-	-	-	-	-	-	-	-	-	-
	21HI08GT05UCD-EC	E	O80:H6	8619	United States	2021	ground turkey		5566130	433888	325	134286	12		SRR18061908	PRJNA292663	SAMN26027222	from the NCBI database		-	-	-	-	-	-	-	-	-	+	+	+	+	-	-	-	-		-	-	-	-	-	-	-	-	-	-	-	-
	SES5589	E	O80:H45	4175	Belgium	2020	Healthy Bull		5087477	755264	192	401527	5		SRR22703846	PRJNA906740	SAMN32092019	This study		+	+	+	-	-	-	-	-	-	-	-	-	-	-	-	-	-		-	-	-	-	-	-	-	-	-	-	-	+
2	SES5725	E	O80:H45	4175	Belgium	2020	Healthy Bull		5026259	713730	123	578947	4		SRR22703845	PRJNA906740	SAMN32092020	This study		+	+	-	-	-	+	-	-	-	-	+	-	-	-	-	-	-		-	-	-	-	-	-	-	-	-	-	-	+
2	SES5726	E	O80:H45	4175	Belgium	2020	Healthy Bull		5020129	713730	117	581740	4		SRR22703837	PRJNA906740	SAMN32092021	This study		+	+	-	-	-	+	-	-	-	-	+	-	-	-	-	-	-		-	-	-	-	-	-	-	-	-	-	-	+
2	SES5845	E	O80:H45	4175	Belgium	2020	Healthy Bull		5004817	713730	102	416288	5		SRR22703836	PRJNA906740	SAMN32092022	This study		+	+	-	-	-	+	-	-	-	-	+	-	-	-	-	-	-		-	-	-	-	-	-	-	-	-	-	-	+
2	SES5849	E	O80:H45	4175	Belgium	2020	Healthy Bull		5004092	713730	100	403863	5		SRR22703835	PRJNA906740	SAMN32092023	This study		+	+	-	-	-	+	-	-	-	-	+	-	-	-	-	-	-		-	-	-	-	-	-	-	-	-	-	-	+
	SES6156	E	O80:H45	4175	Belgium	2022	Healthy Cow		5016341	615074	104	347808	6		SRR22703839	PRJNA906740	SAMN32092034	This study		-	+	+	-	-	-	-	-	-	-	-	-	-	-	-	-	-		-	-	-	-	-	-	-	-	-	-	-	+
	CanClin81	E	O80:H45	4175	Belgium	2009	Duck		5230094	1056399	122	651842	4		SRR22703838	PRJNA906740	SAMN32092035	This study		-	+	-	-	-	+	+	-	+	+	-	-	-	-	+	-	-		+	+	+	+	+	+	+	+	+	+	+	+
	CFS3365	E	O80:H45	4175	France	2010	Bovinae; Mastitis		5117501	626566	153	333989	6		ERR3333586	PRJEB32666	SAMEA5619080	from the NCBI database		+	+	+	-	-	-	-	-	-	-	-	-	-	-	-	-	-		-	-	-	-	-	-	-	-	-	-	-	+
	CFS3327	E	O80:H45	1301	Germany	2004	Bovinae; Mastitis		5088875	678334	187	285837	6		ERR3333548	PRJEB32666	SAMEA5619042	from the NCBI database		+	+	-	-	-	+	-	-	-	-	-	-	-	-	-	-	-		-	-	-	-	-	-	-	-	-	-	-	+
	FDA1149481-S003-085	E	O80:H45	4175	United States	2020	environmental | cow; cow manure		5331451	705634	68	552787	5		SRR13240077	PRJNA230969	SAMN17058957	from the NCBI database		+	+	-	-	-	+	+	+	-	-	+	-	-	-	-	-	-		-	-	-	-	-	-	-	-	-	-	-	+
	41100011	E	O80:H45	1301	Canada	2007	Holstein Friesians; Dairy milk		5097639	620830	117	412253	6		SRR11308037	PRJNA612640	SAMN14379539	from the NCBI database		+	+	-	-	-	+	-	-	-	-	-	-	-	-	+	-	-		-	-	-	-	-	-	-	-	-	-	-	-
	203A12Eco	E	O80:H45	4175	Poland	2016	No information		4832379	690932	56	314602	6		ESC_TA7527AA			from the EnteroBase database		-	-	-	-	-	-	-	-	-	-	-	-	-	-	-	+	-		-	-	-	-	-	-	-	-	-	-	-	+
	RH03|T2-SOC05	E	O80:H45	4175	United Kingdom	2017	soil[ENVO:00001998]; Pooled soil sample collected from floor of pig farm		4949530	573675	265	349311	6		SRR12183884	PRJNA605147	SAMN15488558	from the NCBI database		-	-	-	-	-	-	-	-	-	-	-	-	-	-	-	-	-		-	-	-	-	-	-	-	-	-	-	-	+
	SAMEA4645274	E	O80:H45	4175	United Kingdom	2015	porcine; Caecal Content		4924360	354466	346	195825	10		ERR7420982	PRJEB26317	SAMEA4645274	from the NCBI database		-	-	-	+	+	-	-	-	-	-	-	-	-	-	-	-	-		-	-	-	-	-	-	-	-	-	-	-	+
	20180054	E	O80:H45	4175	United Kingdom	2017	Bovine		5030650	718697	63	323613	6		ESC_BB1134AA			from the EnteroBase database		+	+	-	-	-	+	-	-	-	-	-	-	-	-	-	-	-		-	-	-	-	-	-	-	-	-	-	-	+
* Replicons found in the same scaffold in each strain are indicated by the same colour.
† Gene products of each gene are indicated by parentheses.
‡ Genes conserved in E. coli strain K-12.
[truncated: 37 more columns]

## Sheet: TableS2
Table S2. The pS88 genes used for repertoire analysis as references.
All sequences are those encoded by pECOS88.
Gene	Locus_tag	Product	Sequences
iutA	ECS88_p0009	Ferric aerobactin receptor precusor IutA	ATGATGATAAGCAAAAAGTATACGCTTTGGGCTCTCAACCCACTGCTTCTTACCATGATGGCGCCAGCAGTCGCTCAACAAACCGATGATGAAACGTTCGTGGTGTCTGCCAACCGCAGCAATCGCACCGTAGCGGAGATGGCGCAAACCACCTGGGTTATCGAAAACGCCGAACTGGAACAGCAGATTCAGGGCGGCAAAGAGCTTAAAGACGCACTGGCTCAGCTGATCCCTGGCCTTGACGTCAGCAGCCGGAGCCGCACCAACTACGGTATGAATGTGCGTGGCCGCCCGCTGGTCGTGCTGGTTGACGGCGTGCGTCTCAACTCTTCACGTACCGACAGCCGACAACTGGACTCTATAGATCCTTTTAATATCGACCATATTGAAGTGATCTCC…
iucD	ECS88_p0010	L-lysine 6-monooxigenase IucD	ATGAAAAAAAGTGTCGATTTTATTGGTGTAGGGACAGGGCCATTTAATCTCAGCATTGCTGCGTTGTCACATCAGATCGAAGAACTGGACTGTCTCTTCTTTGATGAACATCCTCATTTTTCCTGGCATCCGGGTATGCTGGTACCGGATTGTCATATGCAGACCGTCTTTCTGAAAGATCTGGTCAGTGCTGTTGCACCTACAAATCCCTACAGTTTTGTTAACTATCTGGTGAAGCACAAAAAGTTCTATCGCTTCCTTACAAGCAGACTACGTACAGTATCCCGTGAAGAGTTTTCTGACTACCTCCGCTGGGCTGCTGAAGATATGAATAACCTGTATTTCAGTCATACCGTTGAAAACATTGATTTCGATAAAAAACGTCGATTGTTTCTGGTG…
iucC	ECS88_p0011	Aerobactin siderophore biosynthesis protein IucC	ATGAATCACAAAGACTGGGATTTGGTCAACCGCCGCCTGGTGGCAAAAATGTTGTCTGAGCTGGAGTATGAGCAGGTTTTCCACGCGGAATCTCAGGGCGATGACCGCTACTGCATTAACCTGCCGGGAGCACAATGGCGCTTCATCGCTGAACGTGGTATCTGGGGCTGGCTCTGGATTGATGCTCAAACTCTGCGCTGCGCGGACGAGCCAGTACTGGCTCAGACGCTGCTGATGCAGCTAAAGCAGGTACTGTCAATGAGCGATGCAACCGTTGCTGAGCATATGCAGGATTTGTATGCCACGCTGCTGGGCGACCTGCAACTACTGAAAGCCCGTCGCGGGCTGAGCGCCAGTGACCTGATTAATCTTAATGCCGACCGCCTGCAATGCCTGCTG…
iucB	ECS88_p0012	N(6)-hydroxylysine acetylase IucB	ATGTCTGGGGCAAACATTGTTCACAGCGGATATGGACTGCGCTGTGAAAAACTCGACAAGCCTCTGAATCTTGGCTGGGGGCTGGACAATAGCGCGGTGTTGCACTGGCCCGGGGAGCTGCCAACAGGGTGGCTGTGCGACGCGCTGGATCAGATATTTATCGCCGCACCACAACTTTCAGCAGTGGTTCTTCCCTGGTCCGAATGGTGTGAGGAGCCACAGGCGCTGACGCTTTTCGGACAGGTACAAAGCGACATTATCCATCGTTCCGCTTTCTGGCAGTTACCGTTATGGCTGAGTTCTCCGGCAAACCGGGCCTCCGGTGAAATGGTTTTTGATGCAGAGCGTGAGATTTATTTCCCGCAGCGCCCCCCCCGTCCGCAGGGTGAAGTTTATCGT…
iucA	ECS88_p0013	Aerobactin siderophore biosynthesis protein IucA	TTGATAATGAGAATCATTATTGACATAATTGTTATTATTTTACTGTGTAGGAGCTGTTTGATTATGATCCTGCCCTCTGAAAAATCCGCCACAGATGTGGCTGCGCAGTGCTTCCTGAATGCCTTGATTCGTGAAACCAAAGACTGGCAACTGGCGGAATACCCGCCAGACGAATTGATTATCCCGCTGGACGAACAGAAGTCGCTCCATTTCAGAGTGGCTTATTTCTCCCCAACCCAGCATCACCGCTTTGCATTTCCTGCTCATCTGGTCACGGCATCAGGCAGTTATCCTGTCGACTTTACCACTCTCTCCCGGCTTATTATTGATAAGCTCCGGCATCAACTTTTTCTGCCAGTTCCCCTCTGCGAAACTTTCCACCAACGCGTGCTGGAAAGC…
shiF	ECS88_p0014	putative membrane transport protein ShiF	ATGTCATCTAAGATCGAAGATACGCCCCAAAAAACCCTGTCCTGCTGGCCACTGGCGTTCAGTGCCGGTCTTCTCGGTATCGGACAGAACGGTCTGCTGGTTGTACTCCCTGTTCTGGTCATACAGACAAATCTGAGTCTGTCTGTATGGGCTGCCCTGCTGATGCTGGGCTCAATGCTGTTTCTGCCATCTTCCCCATGGTGGGGAAAGCAAATTTCCCTTACTGGCAGTAAGACTGTGGTGCTGTGGGCTCTGGGAGGATATGGCGTAAGCTTTACCCTGCTTGGGCTGGGAAGCGTGCTGATGGCTACCGGTGCCGTAACAACAGCGGTGGGGTTGGGAATATTAATCATCGCCCGGATCGTCTACGGTCTGACCGTGTCAGCAATGGTGCCAGCC…
sitD	ECS88_p0019	SitD protein, Iron transport protein, inner membrane component	ATGATGGCATTATTACTGGAGCCACTGCAGTTCACCTTTATGAGTCACGCACTGCTGATTTCACTGGTAGTTTCCATACCCTGTGCGCTGCTGTCGGTCTTTCTGGTCCTGAAAAGTTGGGCACTGATGGGTGACGCGATGAGTCATGCGGTTTTTCCTGGCATCGTGCTTGCCTGGATTCTGGGGTTACCTCTGGCTACAGGGGCATTCGTCGCCGGAGTATTCTGTGCGGTGGCGACGGGATACCTGAAAGACAACAGCCGAATCAAGCAAGATACAGTGATGGGGATTGTTTTTTCTGGCATGTTTGCCGCAGGTCTGATCTTGTATATTGCAGTCAAACCAGACGTACATCTTGATCATATTCTTTTCGGCGACATGCTCGGGATAACCATCGGC…
sitC	ECS88_p0020	SitC protein, iron transport protein, inner membrane component	ATGAACGCGCTACTGGAACCCTTCAGCTATGAATATATGCTCAATGCGATGTGGGTCTCGGCGATGGTCGGCGGTCTCTGCGCTTTCCTGTCATGCTATCTGATGCTAAAAGGCTGGTCGCTGATTGGCGATGCGCTGTCGCACTCTATTGTCCCGGGTGTTGCGGGGGCATATATGCTGGGGCTTCCGTTTTCTCTGGGAGCCTTCTTTTCCGGCGGACTGGCAGCGGGCAGCATGCTGTTTCTTAACCAACTCACTCGCTTAAAAGAAGATGCCATCATCGGCCTGATCTTCTCGTCCTTTTTTGGCCTGGGGCTGTTTATGGTGTCATTGAACCCGACATCCGTGAACATTCAGACCATCGTCCTGGGCAATATTCTGGCAATCGATCCGGCGGAT…
sitB	ECS88_p0021	SitB protein, iron transport protein, ATP-binding component	ATGATGCAATCTGCAGGCATTGTCGTTAATGATGTTACTGTCACCTGGCGTAACGGGCACACAGCACTGCGCGATGCATCCTTCACAGTACCAGGCGGATCTATTGCCGCTCTGGTTGGGGTAAACGGTTCCGGAAAATCGACGTTGTTTAAAGCGATTATGGGATTTGTGCGTCTGACCAGCGGGAAGATATCTGTTCTGGGTATTCCCACACGACAGGCGCTACAGAAAAACCTGGTTGCCTACGTCCCTCAGTCAGAAGAGGTTGACTGGTCATTTCCTGTACTGGTGGAAGATGTGGTGATGATGGGCCGCTATGGGCATATGGGTATGTTGCGTATCGCCAAAAAGAGGGATCGTCAGATTGTCACCGATGCGCTGGAACGTGTCGATATGGTG…
sitA	ECS88_p0022	SitA protein, iron transport protein, periplasmic-binding protein	ATGCTCTCAATAAAAAAAGTAACCATGCTCTTGGGGTGCCTAGTCCTCACCTGCTCGATAGCATTTCAGGCGAGTGCAGCTGAAAAATTCAAGGTCATTACAACTTTTACCATCATCGCAGATATGGCCAAAAACGTGGCTGGAGATGCTGCAGAAGTCTCATCCATAACCAAGCCTGGTGCAGAAATTCATGAGTATCAGCCTACCCCTGGCGATATTAAACGTGCGCAGGGGGCACAACTGATTCTCGCCAATGGTATGAATCTGGAATTGTGGTTCCAACGCTTTTACCAGCATCTCAATGGGGTTCCAGAAGTAATTGTCTCTTCGGGTGTGACGCCAGTAGGGATCACCGAAGGGCCCTATGAGGGCAAACCTAACCCCCATGCCTGGATGTCG…
cia	ECS88_p0104	Colicin-Ia	ATGTCTGACCCTGTACGTATTACAAATCCCGGTGCAGAATCGCTGGGGTATGATTCAGATGGCCATGAAATTATGGCCGTTGATATTTATGTAAACCCTCCACGTGTCGATGTCTTTCATGGTACCCCGCCTGCATGGAGTTCCTTCGGGAACAAAACCATCTGGGGCGGAAACGAGTGGGTCGATGATTCCCCAACCCGAAGTGATATCGAAAAAAGGGACAAGGAAATCACAGCGTACAAAATGACGCTCAGCGCGCAGCAGAAAGAGAATGAGAATAAGCGTACTGAAGCCGCAAAACGCCTCTCTGCGGCGATTGCTGCAAGGGAAAAAGATGAAAACACACTGAAAACACTCCGTGCCGGAAACGCAGATGCCGCTGATATTACACGACAGGAG…
imm	ECS88_p0105	Colicin-Ia immunity protein	ATGAACAGAAAATATTATTTTAATAATATGTGGTGGGGATGGGTGACGGGGGGATATATGCTGTATATGTCATGGGATTATGATTTTAAATACAGATTACTGTTCTGGTGTATTTCTCTCTGCGGAATGGTTTTGTATCCGGTTGCAAAATGGTATATTGAAGATACAGCTCTGAAATTTACCCGGCCTGATTTCTGGAACAGCGGTTTTTTTGCTGATACACCTGGAAAAATGGGATTGCTTGCTGTTTATACGGGTACTGTTTTCATATTATCTCTTCCGTTAAGTCTGATATATATTCTTTCTGTTATTATAAAAAGGCTGTCTGTAAGATAG
cvi	ECS88_p0114	Colicin V immunity protein	ATGGATAGAAAAAGAACAAAATTAGAGTTGTTATTTGCATTTATAATAAATGCCACCGCAATATATATTGCATTAGCTATATATGATTGTGTTTTTAGAGGAAAGGACTTTTTATCCATGCATACATTTTGCTTCTCTGCATTAATGTCTGCAATATGTTACTTTGTTGGTGATAATTATTATTCAATATCCGATAAGATAAAAAGGAGATCATATGAGAACTCTGACTCTAAATGA
cvaC	ECS88_p0115	Colicin V precursor (Microcin V bacteriocin)	ATGAGAACTCTGACTCTAAATGAATTAGATTCTGTTTCTGGTGGTGCTTCAGGGCGTGATATTGCGATGGCTATAGGAACACTATCCGGGCAATTTGTTGCAGGAGGAATTGGAGCAGCTGCTGGGGGTGTGGCTGGAGGTGCAATATATGACTATGCATCCACTCACAAACCTAATCCTGCAATGTCTCCATCCGGTTTAGGGGGAACAATTAAGCAAAAACCCGAAGGGATACCTTCAGAAGCATGGAACTATGCTGCGGGAAGATTGTGTAATTGGAGTCCAAATAATCTTAGTGATGTTTGTTTATAA
cvaB	ECS88_p0116	Colicin V secretion/processing ATP-binding protein CvaB	ATGACTAACAGGAATTTCAGACAAATTATAAATCTGCTTGATTTGCGCTGGCAACGTCGTGTTCCGGTTATTCATCAGACGGAGACCGCTGAATGTGGACTGGCCTGCCTAGCAATGATATGCGGTCATTTTGGTAAGAATATTGACCTGATATATCTTCGCCGGAAGTTTAATCTCTCTGCCCGTGGAGCAACCCTTGCAGGAATCAATGGAATAGCGGAGCAACTGGGGATGGCCACCCGGGCTCTTTCACTGGAGTTGGATGAACTTCGAGTCCTCAAAACGCCGTGTATTCTCCACTGGGATTTCAGTCACTTCGTCGTTCTGGTCAGCGTAAAGCGTAACCGTTATGTACTGCATGATCCGGCCAGGGGCATAAGATATATCAGCCGGGAGGAA…
cvaA	ECS88_p0117	Colicin V secretion protein CvaA	TTGTTTCGCCAGGATGCTTTAGAAAACAGAAAAATGAAGTGGCAGGGACGGGCAATATTACTTCCCGGAATACCACTGTGGTTAATCATGCTGGGAAGCATTGTGTTTATTACGGCATTTCTGATGTTCATTATTGTTGGTACCTATAGCCGCCGTGTTAATGTCAGTGGTGAGGTCACAACCTGGCCAAGAGCTGTCAATATATATTCAGGTGTACAGGGATTTGTTGTCAGGCAGTTTGTTCATGAAGGGCAGTTGATAAAAAAAGGGGATCCTGTTTATCTGATTGACATCAGTAAAAGTACACGCAATGGTATTGTCACTGATAATCATCGCCGGGATATAGAAAACCAGCTGGTTCGTGTGGACAACATTATTTCCCGTCTGGAAGAAAGTAAA…
iroN	ECS88_p0124	IroN, salmochelin siderophore receptor	ATGAGAATTAACAAAATCCTCTGGTCGCTAACTGTGCTCCTGGTTGGGTTGAATAGCCAGATATCAGTAGCCAAATCCTCCGACGATGATAATGACGAGACTCTGGTGGTGGAAGCCACCGCTGAGCAGGTATTAAAACAGCAGCCGGGCGTGTCGGTTATTACCAGCGAGGATATTAAAAAGACCCCTCCGGTAAACGACCTTTCAGATATTATTCGTAAAATGCCTGGTGTCAATCTTACCGGCAATAGCGCCTCGGGCACACGCGGTAATAACCGCCAGATCGATATTCGAGGTATGGGGCCGGAAAACACCTTAATTTTAATTGATGGTGTACCGGTGACGTCACGTAACTCCGTGCGTTATAGCTGGCGTGGAGAGCGTGATACCCGCGGTGAC…
iroE	ECS88_p0125	IroE, putative hydrolase	ATGTATGCCCGCGAGTATCGCTCAACACGCCCGCATAAAGCGATTTTCTTTCATCTTTCTTGCCTCACCCTTATCTGTAGTGCGCAAGTTTATGCGAAGCCGGATATGCGGCCACTGGGGCCGAATATAGCCGATAAAGGCTCCGTGTTTTACCATTTCAGCGTCACCTCTTTCGACTCTGTCGATGGCACACGCCATTATCGGGTATGGACGGCCGTGCCGAATACAACCGCACCGGCATCGGGTTACCCGATTTTATATATGCTTGACGGTAACGCAGTTATGGATCGCCTGGATGACGAACTGCTCAAACAATTGTCAGAAAAAACACCGCCAGTGATCGTGGCTGTCGGGTATCAGACCAACCTCCCTTTCGATCTCAATAGCAGGGCTTACGAC…
iroD	ECS88_p0126	IroD, putative ferric enterochelin esterase	ATGCTGAACATGCAACAACATCTCTCTGCTATCGCCAGCCTGCGCAACCAACTGGCAGCGGGCCACATTGCTAACCTTACTGACTTCTGGCGCGAAGCTGAGTCGCTGAATGTTCCTCTTGTGACGCCAGTCGAAGGAGCGGAAGATGAGCGAGAAGTGACCTTTCTGTGGCGCGCCCGACATCCTCTGCAGGGCGTTTATCTGCGTCTGAACCGGGTGACGGATAAAGAGCACGTAGAAAAAGGAATGATGAGCGCCCTTCCCGAAACGGATATCTGGACACTGACACTGCGTTTACCCGCAAGTTACTGCGGCTCCTATTCGCTGCTGGAAATCCCCCCCGGCACTACGGCTGAGACGATTGCACTGTCCGGAGGCCGTTTTGCCACCCTTGCCGGA…
iroC	ECS88_p0127	IroC, ATP binding cassette (ABC) transporter homolog	ATGCCTGCGAATCACACTCCCACACCGGCTCAGTCATGGATAGTTCGCCTAGCGCGCGTGTGCTGGGAACGTAAGAAACTTAGTGTCATCGTGGTGGTAGCGTCAGTATCGACTATTTTGCTGGCTGCGCTGACGCCACTGCTGACAAGACAGGCTGTGAATGACGCACTGGCGGGCAATCCGGCCCGCCTGCCGTGGCTGGCCTGCGGGTTACTGTTGATCGCTTTTTTTGATTTCATCGGTAACTATGTGCGCCGTGGTTATGCCGGGATGCTCTCACTCTGGGTGCAGCATACCCTCAGAGGACGGGTATTCGACAGTATTCAGAAACTTGACGGCGCAGGCCAGGATGCGCTGCGCACCGGGCAGGTGATTTCACGGACCAACAGCGATCTGCAG…
iroB	ECS88_p0128	IroB, putative glucosyltransferase	ATGCGTATTTTGTTTGTAGGCCCGCCTCTCTATGGGCTGTTGTATCCTGTGCTGTCTCTGGCGCAGGCATTTCGCGTTAACGGTCATGAAGTGCTGATCGCCAGTGGAGGACAATTCGCACAAAAAGCGGCAGAGGCCGGGTTGGTGGTGTTTGACGCCGCACCCGGTCTGGATTCCGAAGCTGGTTACCGCCACCATGAGGCACAGCGGAAAAAAAGTAATATCGGAACCCAAATGGGCAACTTCTCATTCTTCAGCGAAGAAATGGCCGACCATCTGGTGGAGTTTGCCGGACACTGGCGGCCTGACCTCATCATCTACCCTCCGCTCGGAGTCATCGGGCCGCTGATTGCCGCCAAATATGATATACCGGTCGTGATGCAAACCGTAGGCTTCGGC…
iss	ECS88_p0133	Iss (Increased serum survival)	ATGAAAAAAATGTTATTTTCTGCCGCTCTGGCAATGCTTATTACAGGATGTGCTCAACAAACGTTTACTGTTGGAAACAAACCGACAGCAGTAACACCAAAGGAAACCATCACTCATCATTTCTTCGTTTCGGGAATTGGACAAGAGAAAACTGTTGATGCAGCCAAAATTTGTGGCGGTGCAGAAAATGTTGTTAAAACAGAAACTCAGCAAACATTCGTAAATGGATTGCTCGGTTTTATCACTTTTGGCATCTATACTCCGCTGGAAGCCCGGGTATATTGCTCACAATAG
etsC	ECS88_p0146	putative type I secretion outer membrane protein EtsC	ATGAAAATTTTATCATCGTTGACTTTATGCCTTATCACCGCACTCTGTTCAGGTTGCACAAACGTGCTGAAAAGTGACTATCGCGCTCCCGAAGTGAACTATCCCATCAACTGGACCAAGGGCGATGTGGACGGAAATACATCCCCGTTTGACTGGGAAGAATTTAACGATCCTAATCTCGATAACTGGCTTCACCTGGTGATGACAAGTAATAACGACATAGCTATAGCTGCACTGCGGATACATCGGGCGCAGCTGGATGCGGAAAGAACAGGTATCACCAATACTCCTGCACTAAAGGCGGCACTGAGTATGGACGGAAAAAAACAGCTGAATAACTCGTCCGGCTGGGCAAAAAGCGGTTCTGCCAGCCTTGGCACCAGCTATGAGCTGGATCTC…
etsB	ECS88_p0147	putative type I secretion ATP binding protein EtsB	GTGAAAAAACTTATTGAGTTAAAAGGGGTTAGCCGAACTTATGGCAACGGAGATCAAACGCGGACCGTCCTGAAAAATGTCGATTTGACAATCGTTGCTGGAGAAATGGTGGCAATCATTGGAGTCTCTGGCTCAGGCAAATCAACCTTAATGAACATAATGGGTTGCCTTGACGTACCCAATAGAGGTGATTACTACATCGACGGACAAAATGCCGCCTGTCTTTCACCCGATGAGCTGGCTAGAGTGCGCCGGGAACACATTGGCTTTATATTCCAGCGCTACCATTTGATACCTGATCTTAGCGCACTTGGTAACGTGGAGATCCCGGCCATTTACGCCAACAGCGAACGCGACAGCCGTCGGCAACGTGCAACGGCGTTGCTGGGCAGACTGGGA…
etsA	ECS88_p0148	putative type I secretion membrane-fusion protein EtsA	TTGTTATGGAAAACATGGACAATGTTAATGAAATATATTTCTCACCGCGCCATCATTTGTACCTTGACACTGTTGATCATTATTATCACCGTTTTGTTCACCTTTCTGAGAAGCTCTGATGTGCCAGAATATATTACTGCCCCGGTGCGCAAAGGCGATATAGAAAATTCTGTTCTGGCGACAGGCCGTATTGATGCAATTGAACGGGTAAACGTAGGGGCACAGGTATCAGGGCAATTAAAATCACTGAAAGTGAAACAGGGCGACCATGTGACTAAAGGGCAGTTGATTGCCGAAATTGACGACCTACCTCAGTGTAACGATTTGCGTAATGCCGAAGCTGCACTCAACGAAGTGAAAGCAGAACTTCAATCCAAGCAGGCGCTCCTGAAACAGGCT…
ompT	ECS88_p0155	outer membrane protease (omptin)	ATGTACTTAAAGATTCTTGCTACTGCACTCTCAGCTCCTGTAGCGTTTGCTGCACTGGCTTCTGATACTGGGCTTTCTTTTACACCGGAGAAAATCAGTACGGAGATTGATTTTGGCACTTTAAGTGGCAAGGCCAAAGAACGGGTTTATCTGCCTGAAGAAAAAGGGCGCAAAGCCAGCCAGCTGGACTGGAAATACAGTAATGCGCCAATTGTCAAGGGGGCATTTAACTGGGATCTGTTACCCAGAGTATCTGTCGGTGCCTCAGGGTGGACAACATTAGCTGGTCGTGGAGGCAATATGGTGGACAGGGACTGGCTGGATACGAGCAATCCCGGAACCTGGACTGATGAGAGTAAACATCCGAATACCCGTCTAAATTTTGCTAATGAATTCGAC…
hlyF	ECS88_p0156	hemolysin HlyF	ATGAAATTATTATTACTTACAGGTGCAACAGGATTTCTTGGTGGCGCGGTCCTGGATAAGCTGCTGGATAACTGTAATAATATAAATTTGCTACTTTTAGTACGAGCACCTACTCCACAAGCGGGACTGGAAAGAATTAAAGAAAATATGCGTAAATTTAATGTTTGTGAGGAAAGGTTGCATGCATTAACTAATGATAACATCTTGCCTGGGGATCTAAATAATCCGGAAGCCTTTCTCATGGATCCTCGTCTTGATGAAGTCACTCATGTTATAAACTGTGCGGCTATAGCTTCTTTTGGTAATAATCCTTTTATATGGAATGTGAATGTTACAGGTACACTTGCTTTTGCAAGAAGAATGGCAAAAGTGGCAGGACTGAAACGCTTCCTTCATGTT…

## Sheet: TableS3
Table S3. E. coli strains used for the construction of a core gene-based phylogenetic tree.
Strain	Serotype	Phylogroup	Accession number*	Reference
RM8385	O103:H11	B1	CP028112	Parker CT, et al. Microbiol Resour Announc 2018;7:e00807-18.
12009	O103:H2	B1	AP010958	Ogura Y, et al. Proc Natl Acad Sci USA 2009;106:17939-17944.
2013C-3264	O103:H25	B1	CP027544	Patel PN, et al. Genome Announc 2018;6:e00391-18.
94-3024	O104:H21	B1	CP009106	Yan X, et al. BMC Microbiol 2015;15:83.
C227-11	O104:H4	B1	CP011331	Beaulaurier J, et al. Nat. Commun 2015;6:7438.
RM9387	O104:H7	B1	CP009104	Yan X, et al. BMC Microbiol 2015;15:83.
11128	O111:H8	B1	AP010960	Ogura Y, et al. Proc Natl Acad Sci USA 2009;106:17939-17944.
2014C-4705	O112:H21	B1	CP027640	Patel PN, et al. Genome Announc 2018;6:e00391-18.
RM10466	O113:H21	B1	CP028381	Parker CT, et al. Microbiol Resour Announc 2018;7:e00807-18.
90-9280	O114:H49	B1	CP024240	Smith P, et al. Genome Announc 2018;6:e01311-17.
2015C-4498	O117:H8	B1	CP027552	Patel PN, et al. Genome Announc 2018;6:e00391-18.
2013C-4538	O118:H16	B1	CP027582	Patel PN, et al. Genome Announc 2018;6:e00391-18.
2009C-3133	O119:H4	G	CP013025	Lindsey RL, et al. Genome Announc 2015;3:e01496-15.
PCN033	O11:H15	D	CP006632	Liu C, et al. BMC Genomics 2015;16:717.
MRY15-117	O11:H25	F	AP017617	Sekizuka T, et al. Sci Rep 2017;7:928.
16-9255	O121:H19	B1	CP022407	Robertson J, et al. Genome Announc 2018;6:e01561-17.
E2348/69	O127:H6	B2	FM180568	Iguchi A, et al. J Bacteriol 2009;191:347-354.
90-9281	O128:H27	B1	CP024243	Smith P, et al. Genome Announc 2018;6:e01311-17.
07-4299	O130:H11	B1	CP027462	Patel PN, et al. Genome Announc 2018;6:e00391-18.
NCTC9966	O134:H35	A	LS483296	unpublished
NCTC9967	O135:H30	A	LS483303	unpublished
08-00022	O136:H16	A	CP013662	Lorenz SC, et al. Genome Announc. 2016;4:e00846-16.
88-3493	O137:H41	E	CP027457	Patel PN, et al. Genome Announc 2018;6:e00391-18.
E24377A	O139:H28	B1	CP000800	Rasko DA, et al. J Bacteriol 2008;190:6881-6893.
CFSAN004176	O145:H25	A	CP014583	Lorenz SC, et al. BMC Microbiol 2017;17:183.
RM13514	O145:H28	D	CP006027	Cooper KK, et al. BMC Genomics 2014;15:17.
2015C-4136CT1	O145:H34	B2	CP027550	Patel PN, et al. Genome Announc 2018;6:e00391-18.
2013C-3033	O146:H21	B1	CP027323	Patel PN, et al. Genome Announc 2018;6:e00391-18.
UMNF18	O147:H4	A	AGTD01000001	Shepard SM, et al. J Bacteriol 2011;194:395-405.
UMNK88	O149:H10	A	CP002729	Shepard SM, et al. J Bacteriol 2011;194:395-405.
SE15	O150:H5	B2	AP009378	Toh H, et al. J Bacteriol 2010;192:1165-1166.
SE11	O152:H28	B1	AP009240	Oshima K, et al. DNA Res 2008;15:375-386.
2011C-4315	O153:H2	B1	CP024479	Schroeder MR, et al. Genome Announc 2018;6:e01384-17.
13E0780	O156:H25	B1	CP020106	Geue L, et al. Genome Announc 2017;5:e00321-17.
13E0767	O156:H8	B1	CP020107	Geue L, et al. Genome Announc 2017;5:e00321-17.
Santai	O157:H16	D	CP007592	unpublished
2016C-3936C1	O157:H48	D	CP018770	Lindsey RL, et al. Genome Announc 2017;5:e01725-16.
Sakai	O157:H7	E	BA000007	Hayashi T, et al. DNA Res. 2001;8:11-22.
90-9272	O15:H11	A	CP024239	Smith P, et al. Genome Announc 2018;6:e01311-17.
NCTC11023	O160:H34	A	LS483297	unpublished
2012C-4277	O165:H25	A	CP013029	Lindsey RL, et al. Genome Announc 2015;3:e01496-15.
09-00049	O168:H8	B1	CP015228	Lorenz SC, et al. Genome Announc. 2016;4:e00846-16.
F6326-C1	O169:H41	E	CP024263	Smith P, et al. Genome Announc 2018;6:e01311-17.
88-3510	O172:H25	A	CP027675	Patel PN, et al. Genome Announc 2018;6:e00391-18.
89-3156	O174:H21	B1	CP027366	Patel PN, et al. Genome Announc 2018;6:e00391-18.
O177H21	O177:H21	B1	CP016546	Terveer EM, et al. PLoS One 2017;12:e0178598.
SMN013SH2	O177:H25	A	CP023673	Sheng H, et al. Genome Announc 2018;6:e01592-17.
2012C-4431	O178:H19	B1	CP024289	Schroeder MR, et al. Genome Announc 2018;6:e01384-17.
UMN026	O17:H18	D	CU928163	Touchon M, et al. PLoS Genet. 2009;5:e1000344.
2015C-3905	O181:H49	B1	CP027371	Patel PN, et al. Genome Announc 2018;6:e00391-18.
D181	O182:H21	B1	CP024252	Smith P, et al. Genome Announc 2018;6:e01311-17.
13E0725	O182:H25	B1	CP020092	Geue L, et al. Genome Announc 2017;5:e00321-17.
2014C-3338	O183:H18	G	CP027452	Patel PN, et al. Genome Announc 2018;6:e00391-18.
2012C-4502	O185:H28	G	CP027440	Patel PN, et al. Genome Announc 2018;6:e00391-18.
2013C-3513	O186:H11	B1	CP027555	Patel PN, et al. Genome Announc 2018;6:e00391-18.
CFSAN051542	O18ac:H14	Untypable	CP020835	unpublished
KL53	O18:H14	A	CP030919	Soltys K, et al. Genome Announc 2018;6:e00220-18.
IHE3034	O18:H7	B2	CP001969	Moriel DG, et al. Proc Natl Acad Sci USA 2010;107:9072-9077.
SMS-3-5	O19:H34	F	CP000970	Fricke WF, et al. J Bacteriol 2008;190:6779-6794.
MRY15-131	O1:H25	F	AP017620	Sekizuka T, et al. Sci Rep 2017;7:928.
APEC O1	O1:H7	B2	CP000468	Johnson TJ, et al. J Bacteriol 2007;189:3228-3236.
95-3322	O22:H5	B2	CP027461	Patel PN, et al. Genome Announc 2018;6:e00391-18.
20Ec-P-124	O24:H4	G	AP017610	Sekizuka T, et al. Sci Rep 2017;7:928.
EC958	O25b:H4	B2	HG941718	Forde BM, et al. PLoS One 2014;15:e104400.
F5505-C1	O25:H16	A	CP024257	Smith P, et al. Genome Announc 2018;6:e01311-17.
11368	O26:H11	B1	AP010953	Ogura Y, et al. Proc Natl Acad Sci USA 2009;106:17939-17944.
B4103-1	O27:H7	B1	CP024245	Smith P, et al. Genome Announc 2018;6:e01311-17.
PA45B	O2:H7	B2	CP021288	Goh KGK, et al. mBio 2017;8:e01558-17.
IMT5155	O2:H5	B2	CP005930	Ge XZ, et al. PLoS One 2014;9:e112048.
06-00048	O36:H14	D	CP015229	Lorenz SC, et al. Genome Announc. 2016;4:e00846-16.
2014C-3075	O36:H42	F	CP027447	Patel PN, et al. Genome Announc 2018;6:e00391-18.
RM10042	O43:H2	B1	CP028122	Parker CT, et al. Microbiol Resour Announc 2018;7:e00807-18.
042	O44:H18	D	FN554766	Chaudhuri RR, et al. PLoS One 2010;5:e8801.
S88	O45:H7	B2	CU928161	Touchon M, et al. PLoS Genet. 2009;5:e1000344.
ATCC 700415	O4:H5	B2	CP022609	Xu A, et al. Genome Announc 2018;6:e00134-18.
266917_2	O51:H30	D	CP026723	Greig DR, et al. Microb Genom 2018;4:e000213.
CB9615	O55:H7	E	CP001846	Zhou Z, et al. PLoS One 2010;5:e8700.
86-3153	O5:H9	A	CP027597	Patel PN, et al. Genome Announc 2018;6:e00391-18.
FAM21845	O68:H14	A	CP017220	Marti R, et al. Appl Environ Microbiol 2017;83:e00628-17.
2013C-3252	O69:H11	B1	CP027442	Patel PN, et al. Genome Announc 2018;6:e00391-18.
ATCC25922	O6:H1	B2	CP009072	Minogue TD, et al. Genome Announc 2014;2:e00969-14.
TW10598	O6:H16	A	CM007915	Sahl JW, et al. Infect Immun 2011;79:950-960.
W(ATCC9637)	O6:H49	B1	CP002185	Archer CT, et al. BMC Genomics 2011;12:9.
536	O6:H31	B2	CP000247	Hochhut B, et al. Mol Microbiol 2006;61:584-595.
1303	O70:H32	A	CP009166	Leimbach A, et al. Genome Announc 2015;3:e00182-15.
2013C-4187	O71:H11	B1	CP027546	Patel PN, et al. Genome Announc 2018;6:e00391-18.
MCJCHV-1	O75:H5	B2	CP030111	Nielsen DW, et al. Microbiol Resour Announc 2018;7:e01043-18.
2013C-4390	O76:H19	B1	CP027484	Patel PN, et al. Genome Announc 2018;6:e00391-18.
H10407	O78:H11	A	FN649414	Crossman LC, et al. J Bacteriol 2010;192:5822-5831.
789	O78:H19	C	CP010315	Huja S, et al. mBio 2015;6:e01681-14.
APEC O78	O78:H9	C	CP004009	Mangiamele P, et al. Genome Announc 2013;1:e0002613.
2011C-3911	O79:H7	B1	CP015240	Lindsey RL, et al. Genome Announc 2016;4:e00626-16.
H1827/12	O7:H4	A	CP013031	unpublished
IAI39	O7:H45	F	CU928164	Touchon M, et al. PLoS Genet. 2009;5:e1000344.
2013C-4991	O80:H2	A	CP027355	Patel PN, et al. Genome Announc 2018;6:e00391-18.
ED1a	O81:H27	B2	CU928162	Touchon M, et al. PLoS Genet. 2009;5:e1000344.
NRG857C	O83:H1	B2	CP001855	Nash JH, et al. BMC Genomics 2010;11:667.
05-3629	O8:H16	B1	CP027373	Patel PN, et al. Genome Announc 2018;6:e00391-18.
IAI1	O8:H19	B1	CU928160	Touchon M, et al. PLoS Genet. 2009;5:e1000344.
Es_ST410_NW1_NDM_09_2017	O8:H21	C	CP031231	unpublished
2012EL-2448	O91:H14	B1	CP027586	Patel PN, et al. Genome Announc 2018;6:e00391-18.
RM7190	O91:H21	B1	CP015244	unpublished
CFSAN029787	O96:H19	B1	CP011416	Pettengill EA, et al. Genome Announc 2015;3:e00883-15.
PCN061	O9:H4	A	CP006636	Liu C, et al. BMC Genomics 2015;16:717.
* Chromosomal genome sequence
